# Supplementary material for: Assessing Relapse in Multiple Sclerosis Questionnaire: Results of a Pilot Study
Source: Hindawi journal article supplement (doi:10.1155/2013/470476), 2013-01-01
Supplement: f1 [file 470476.f1.pdf]

## MS Relapse Evaluation—New Relapse

Patient's age in years: \_\_\_\_\_

Patient's sex (circle one):      Male      Female

1) What are the new or worsening symptoms that you are currently experiencing? (*Check all that apply*)

- |                                             |                                                                   |                                                 |
|---------------------------------------------|-------------------------------------------------------------------|-------------------------------------------------|
| <input type="checkbox"/> Vision changes     | <input type="checkbox"/> Speech changes                           | <input type="checkbox"/> Dizziness/poor balance |
| <input type="checkbox"/> Chewing/swallowing | <input type="checkbox"/> Numbness/tingling                        | <input type="checkbox"/> Pain, burning, itching |
| <input type="checkbox"/> Hand/arm weakness  | <input type="checkbox"/> Leg/foot weakness                        | <input type="checkbox"/> Bladder problems       |
| <input type="checkbox"/> Bowel problems     | <input type="checkbox"/> Sexual problems                          | <input type="checkbox"/> Memory problems        |
| <input type="checkbox"/> Fatigue            | <input type="checkbox"/> Muscle tightness or stiffness            | <input type="checkbox"/> Thinking problems      |
| <input type="checkbox"/> Difficulty walking | <input type="checkbox"/> Coordination (tripping, dropping things) |                                                 |
| <input type="checkbox"/> Other: _____       |                                                                   |                                                 |

2) When did these symptoms begin? (*Check one*)

- ☐ Within the last 3 days      ☐ 4 -7 days ago      ☐ 8 -15 days ago      ☐ 16+ days ago

3) How much have these symptoms affected your daily activities or overall function? (*Mark one*)

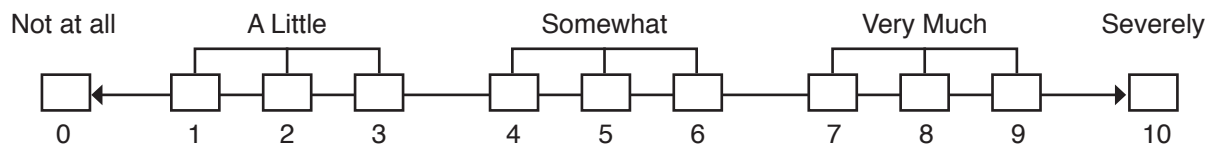

4) How many days/months ago was your last relapse (attack, exacerbation) prior to this current episode? \_\_\_\_\_

5) What treatment did you receive for your last relapse (attack, exacerbation)? (*Check all that apply*)

- |                                                 |                                                                         |                                                                   |
|-------------------------------------------------|-------------------------------------------------------------------------|-------------------------------------------------------------------|
| <input type="checkbox"/> IV steroid infusion    | <input type="checkbox"/> Oral steroid tablets (only)                    | <input type="checkbox"/> Oral steroid tablets (after IV steroids) |
| <input type="checkbox"/> Acthar/ACTH injections | <input type="checkbox"/> No treatment ( <i>skip questions 6 and 7</i> ) | <input type="checkbox"/> Not sure                                 |
| <input type="checkbox"/> Other: _____           |                                                                         |                                                                   |

6) After treatment for your last relapse (attack, exacerbation), how much did you return to your baseline state of health without any residual relapse symptoms? (*Mark one*)

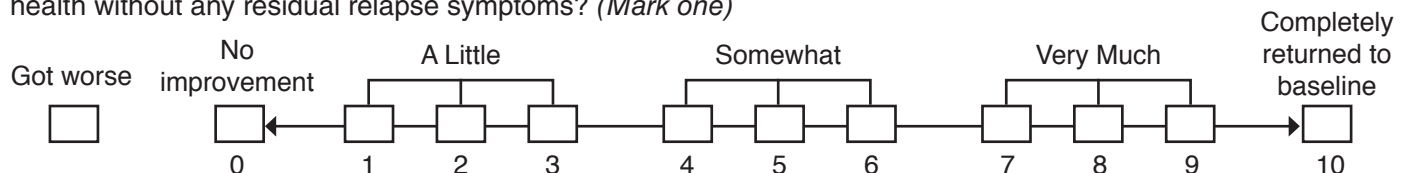

7) Have you had any side effects from treatments for previous MS relapses (attacks, exacerbations)? (*Check all that apply*)

- |                                                          |                                                   |                                                       |
|----------------------------------------------------------|---------------------------------------------------|-------------------------------------------------------|
| <input type="checkbox"/> Mood changes/depression/anxiety | <input type="checkbox"/> Weight gain              | <input type="checkbox"/> Nausea and/or vomiting       |
| <input type="checkbox"/> Sleep disturbance               | <input type="checkbox"/> Increased blood pressure | <input type="checkbox"/> Low blood pressure           |
| <input type="checkbox"/> Stomach upset or heartburn      | <input type="checkbox"/> Headache                 | <input type="checkbox"/> Faintness (light headedness) |
| <input type="checkbox"/> High blood sugar                | <input type="checkbox"/> Increased fatigue        | <input type="checkbox"/> Dizziness                    |
| <input type="checkbox"/> Increased appetite              | <input type="checkbox"/> Fever                    | <input type="checkbox"/> Muscle cramps                |
| <input type="checkbox"/> Chills                          | <input type="checkbox"/> Infection                | <input type="checkbox"/> Other: _____                 |

If you have any questions, please ask your Nurse

### ***For office use only***

Date: \_\_\_\_\_ Patient initials: \_\_\_\_\_

Type of MS (circle one): RRMS      PPMS      SPMS

Type of visit (circle one): Phone      Office

Questionnaire completed by (circle one): Patient      Office Staff
